1 **Hypothalamic perineuronal nets are regulated by sex and dietary interventions**

2 Nan Zhang<sup>1,2</sup>, Zili Yan<sup>1</sup>, Hailan Liu<sup>1</sup>, Meng Yu<sup>1</sup>, Yang He<sup>1</sup>, Hesong Liu<sup>1</sup>, Chen Liang<sup>1</sup>, Longlong Tu<sup>1</sup>, Lina  
3 Wang<sup>1</sup>, Na Yin<sup>1</sup>, Junying Han<sup>1</sup>, Nikolas Scarcelli<sup>1</sup>, Yongjie Yang<sup>1</sup>, Chunmei Wang<sup>1</sup>, Tianshu Zeng<sup>2</sup>, Lu-Lu  
4 Chen<sup>2</sup>, Yong Xu<sup>1,3\*</sup>

5 <sup>1</sup>Children's Nutrition Research Center, Department of Pediatrics, Baylor College of Medicine, Houston,  
6 TX, 77030; <sup>2</sup>Department of Endocrinology, Union Hospital, Tongji Medical College, Huazhong University  
7 of Science and Technology, Wuhan, China; <sup>3</sup>Department of Molecular and Cellular Biology, Baylor  
8 College of Medicine, Houston, TX, 77030

9 \*To whom correspondence should be addressed:

10 Yong Xu, PhD, MD; 1100 Bates Street #8066, Houston, TX 77030, USA, Mail stop code: MCB320, E-mail:  
11 [yongx@bcm.edu](mailto:yongx@bcm.edu), Ph: (713) 798 7199, Fax: (713) 798 7187

12

13 **LEAD AUTHOR: YONG XU**

14

15 **ABSTRACT**

16 Perineuronal nets (PNNs) are widely present in the hypothalamus, and are thought to provide physical  
17 protection and ion buffering for neurons, and regulate their synaptic plasticity and intracellular  
18 signaling. Recent evidence indicates that PNNs in the mediobasal hypothalamus plays an important  
19 role in the regulation of glucose homeostasis. However, whether and how hypothalamic PNNs are  
20 regulated are not fully understood. In the present study, we examined whether PNNs in various  
21 hypothalamic regions in mice can be regulated by sex, gonadal hormones, dietary interventions, or  
22 their interactions. We demonstrated that gonadal hormones are required to maintain normal PNNs in  
23 the arcuate nucleus of hypothalamus in both male and female mice. In addition, PNNs in the terete  
24 hypothalamic nucleus display a sexual dimorphism with females higher than males, and high-fat diet  
25 feeding increases terete PNNs only in female mice but not in male mice. On the other hand, PNNs in  
26 other hypothalamic regions are not influenced by sex, gonadal hormones or dietary interventions. In  
27 summary, we demonstrated that hypothalamic PNNs are regulated in a region-specific manner and  
28 these results provide a framework to further investigate the potential functions of PNNs in regulating  
29 energy/glucose homeostasis at the interplay of sex, gonadal hormones and diets.

30

31

## 32 **Introduction**

33 Obesity is now recognized as a serious global health problem due to its increasing prevalence and  
34 comorbidities, e.g. the metabolic syndrome. The WHO reported that over 650 million adults worldwide  
35 were obese in 2016 and 40 million children under the age of 5 were overweight or obese in 2018. In  
36 U.S., the prevalence of adult obesity was 42.4% in 2017~2018 according to the Centers for Disease  
37 Control and Prevention. The etiology of human obesity is not fully understood, and effective  
38 treatments for obesity and associated metabolic disorders are limited. Recent studies revealed genetic  
39 and epigenetic basis for variations in human body mass index (BMI) (1-3), and strikingly the majority of  
40 BMI-associated genetic variants affect genes that are enriched in the brain (3,4). In particular, the brain  
41 hypothalamus receives metabolic and/or hormonal signals reflecting the body's nutritional status and  
42 coordinates neuroendocrine and behavioral responses to maintain body weight balance (5-7). Indeed,  
43 various genetic variants associated with human obesity have been demonstrated to cause energy  
44 and/or glucose dysregulations through impairing functions of neurons and/or neurocircuits within the  
45 hypothalamus (8).

46  
47 Perineuronal nets (PNNs) in the brain are condensed glycosaminoglycan-rich extracellular matrix  
48 structures (9). PNNs typically enmesh neurons in defined circuits, and are thought to provide physical  
49 protection and ion buffering for neurons, and regulate their synaptic plasticity and intracellular  
50 signaling (9). PNNs abundantly exist in the forebrain regions, e.g. the cortex and the hippocampus, and  
51 the PNNs levels in these regions can be regulated by animals' experience, and have been implicated in  
52 various neurobiological disorders such as schizophrenia, bipolar disorder, Alzheimer's disease and  
53 addictions. Recent evidence indicates that chemical disruption of PNNs in the mediobasal  
54 hypothalamus significantly blunts the glucose-lowering effects of central action of fibroblast growth

55 factor 1 (FGF1) in obese Zucker diabetic fatty (ZDF) rats (10). Thus, hypothalamic PNNs may also play  
56 important roles in the regulation of energy and/or glucose homeostasis. Indeed, abundant PNNs are  
57 present in multiple hypothalamic regions (11,12), but whether and how these hypothalamic PNNs are  
58 regulated are not fully understood.

59

60 In the present study, we sought to examine whether PNNs in various hypothalamic regions can be  
61 regulated by dietary interventions in mice. Since many hypothalamic regions or neural populations are  
62 sexually dimorphic and/or regulated by gonadal hormones (13,14), we also explored the potential  
63 effects of sex and/or gonadal hormones on PNN levels. Our results revealed that sex, gonadal  
64 hormones and/or dietary interventions can regulate PNNs in a region-specific manner and provide a  
65 framework to further investigate the potential functions of PNNs in regulating energy/glucose  
66 homeostasis at the interplay of sex, gonadal hormones and diets.

67

## 68 **METHODS**

### 69 **Study Animals**

70 C57BL6j male and female mice were group-housed respectively until 14 weeks of age in a temperature-  
71 controlled room under a 12h:12h light-dark cycle with ad lib access to regular chow diet (5V5R-  
72 Advanced Protocol PicoLab Select Rodent 50 IF/6F, PicoLab) and water. Forty nine mice are divided  
73 into 16 groups by four factors (1) sex: male or female groups; (2) surgeries: receiving sham or  
74 castration (CAST)/ovariectomy (OVX) surgeries at 14 weeks of age (see below); (3) dietary  
75 interventions: chronic feeding with chow or a high-fat diet (HFD, D12492i Rodent Diet With 60 kcal%  
76 Fat, Research Diets, Inc.), (4) nutritional status: fed or fasted at the time of perfuse (see below). Care of  
77 all animals and procedures were approved by the Baylor College of Medicine Institutional Animal Care  
78 and Use Committee.

79

### 80 **Surgery**

81 At the age of 14 weeks, either bilateral gonadectomy (CAST for males and OVX for females) or sham  
82 surgeries were executed in these mice. The mice were anesthetized with inhaled 2% isoflurane. For  
83 OVX in females, the dorsolateral incisions (2 cm) were made, followed by blunted separation of the  
84 subcutaneous fat, and incision (1.5cm) the abdominal wall to expose the reproductive tract. The  
85 ovaries were isolated and excised. The reproductive tract was returned to the peritoneum and the  
86 incisions on the abdominal wall were sutured using sterile Vicryl thread (size 6); the skin incisions were  
87 sutured by sterile Prolene thread. For sham surgeries in female mice, the procedures were the same,  
88 except that the ovaries were kept intact. For castration in males, a central vertical incision (3 cm) was  
89 made, followed by blunted separation of any subcutaneous fat to locate the vas deferens. The vas  
90 deferens were ligated with Vicryl; the testes were cut and taken away from the fat pad. The skin

91 incisions were sutured by sterile Prolene thread. For sham surgeries in male mice, the procedures were  
92 the same, except that the testes were kept intact.

93

#### 94 **Food intake, body weight, glucose and body composition**

95 One week after the surgeries, mice were randomly divided into two groups to be either regular chow  
96 or HFD described above ad libitum for four weeks. Food intake, body weight and fed glucose were  
97 measured before the surgeries and once each week after the surgery for five weeks. The glucose was  
98 measured using the glucometer via the tail vein; to avoid confounding effects from circadian clock and  
99 feeding behavior on the glucose level, we always measured blood glucose in the morning of the day  
100 and after a 2-hour short fasting to ensure the empty stomach. Body composition (fat mass and lean  
101 mass) was examined with the Bruker minispec mq10 MRS system before the surgeries and 5 weeks  
102 afterwards.

103

#### 104 **Perfusion and WFA staining**

105 Five weeks after the surgeries, mice were further divided into fasted and ad libitum groups before the  
106 perfusion. For the fasted group, mice were fasted overnight and then perfused in the next morning; for  
107 the ad libitum group, both food and water were provided ad libitum at all time before the perfusion.  
108 For the perfusion, mice were anaesthetized with inhaled isoflurane and perfused with saline followed  
109 by 10% formalin. The brain sections were cut at 25  $\mu\text{m}$  and collected into five consecutive series. One  
110 series is used for the following staining and quantification. Free-floating tissue sections were incubated  
111 overnight at room temperature for 22 hours using a 1:500 dilution of biotin-labelled Wisteria  
112 floribunda agglutinin (WFA) (L1516, Sigma-Aldrich) in PBS + 0.25% Triton X-100. The sections were then  
113 washed and incubated for 2 hours at room temperature in 1:500 Streptavidin protein 488 (21832,

114 Invitrogen). Images were captured using a fluorescence microscope with 1s exposure time and no  
115 change of contrast for all pictures to visualize various hypothalamic nuclei, including the arcuate  
116 hypothalamic nucleus (ARH), the terete hypothalamic nucleus (TE), the paraventricular hypothalamic  
117 nucleus (PVH), lateral hypothalamus (LH), the anterior hypothalamus (AH), the ventromedial  
118 hypothalamic nucleus (VMH), the dorsomedial hypothalamic nucleus (DMH), and the perifornical area  
119 of the anterior hypothalamus (PeFAH). Fluorescence intensity of PNNs for each image was quantified  
120 using an established method by the macro plugin “Perineuronal net Intensity Program for the  
121 Standardization and Quantification of ECM Analysis” (PIPSQUEAK AI v5.3.9, Rewire Neuro, Inc.) (15).

122

### 123 **Statistics**

124 Statistical analysis was done using SPSS (SPSS 22.0.0.0, IBM SPSS Statistics) and GraphPad Prism  
125 (GraphPad Prism 8.4.2, Graphpad software, LLC). Multivariate linear regression in SPSS was used to  
126 investigate the influence of sex, GDX and chronic dietary intervention on various metabolic parameters  
127 (cumulative food intake, body weight change, blood glucose change, fat change and lean change). If  
128 sex or GDX was found to have a significant effect on any parameter, the p value for the interaction of  
129 sex and GDX was tested. If any two factors were found to have significant effects, the p value for the  
130 interaction of these two factors was tested.

131

132 For the PNN fluorescence intensity, in addition to the sex, GDX and chronic diet intervention, we  
133 introduced one more factor (nutritional status) as mice were perfused either after an overnight fasting  
134 or ad libitum. Similarly, we first used the multivariate linear regression analyses in SPSS to examine  
135 effects of these 4 factors on PNNs fluorescence intensity in each hypothalamic region. If sex or GDX  
136 was found to have a significant effect on any parameter, we then used the two-way ANOVA to examine

137 the interaction of sex and GDX. In case that sex had a significant effect, we used the GraphPad Prism to  
138 further examine effects of dietary intervention and nutritional status in each sex separately.  $P < 0.05$   
139 was considered statistically significant.

140

141 **Study approval**

142 Care of all animals and procedures were approved by the Baylor College of Medicine Institutional  
143 Animal Care and Use Committee.

144



145 **Results**

146 **Distribution of WFA-labelled PNNs in the mouse hypothalamus**

147 We first surveyed the distribution of PNNs in the mouse hypothalamus using WFA immunostaining.  
148 Abundant WFA-labelled PNNs were detected in multiple hypothalamic regions, including the LH, the  
149 ARH, the VMH and the TE (Figure 1). In addition, we also observed modest WFA immunoreactivity in  
150 the AH, the PVH and the DMH (Figure 1). Consistent with a previous report (12), WFA-labelled PNNs  
151 were also observed in a newly identified hypothalamic area, namely the PeFAH (Figure 1A).

152

153 **Effects of sex, gonadal hormones and dietary interventions on metabolic parameters**

154 Given the essential roles of the hypothalamus in regulating energy homeostasis, we sought to examine  
155 potential effects of dietary interventions on the level of PNNs in the hypothalamus. In order to explore  
156 potential influence by sex and/or gonadal hormones, we included both male and female mice with or  
157 without gonadectomy (GDX) in these analyses. Briefly, male and female C57Bl6j mice underwent sham  
158 or GDX (castration for males and ovariectomy for females) at the 14 weeks of age, followed by 5-week  
159 chronic feeding with either a regular chow diet or HFD. As expected, the multivariate linear regression  
160 analysis revealed that compared to chow-fed groups, HFD feeding had profound effects on multiple  
161 metabolic parameters, including significantly increasing calorie intake, blood glucose, body weight gain  
162 and fat mass gain (Table 1). Notably, fat mass gain was significantly smaller in females than in males  
163 (Table 1). We also noted that lean mass gain was significantly larger in females than in males, and that  
164 GDX significantly reduced lean mass gain; in addition, there was a significant interaction between sex  
165 and GDX on this parameter (Table 1). In summary, multiple metabolic parameters in mice were  
166 influenced by sex, gonadal hormones, the dietary interventions, and/or their interactions, as reported  
167 by others (16,17).

168

169 **Effects of gonadal hormones on PNN in the ARH**

170 At the end of 5-week feeding, mice were then perfused either ad libitum or after an overnight fasting.  
171 We then used these fixed brain samples for WFA immunostaining and then quantified the level of  
172 WFA-labelled PNNs in each hypothalamic region in various conditions. In the ARH, the WFA  
173 fluorescence intensity was not significantly affected by chronic HFD feeding (vs. chow), or by the acute  
174 fasting (vs. ad libitum), as revealed by the multivariate linear regression analysis (Table 2).  
175 Interestingly, we noted that GDX significantly reduced WFA fluorescence intensity in the ARH  
176 compared to the sham group (Table 2 and Figure 2A-2E). A detailed analysis at different rostral-caudal  
177 levels revealed that GDX mainly reduced WFA in the rostral to medial ARH (-1.94 to -1.58 mm to  
178 Bregma) but the caudal ARH was not affected (Figure 2F). Because female and male mice experienced  
179 different GDX surgeries (OVX for females and CAST for males), we used a two-way ANOVA analysis to  
180 further analyze the interaction between sex and GDX. We found that the inhibitory effect of GDX was  
181 independent of sex; in other words, both OVX in females and CAST in males significantly reduced WFA  
182 fluorescence intensity in the ARH (Table 2 and Figure 2G). We also examined effects of dietary  
183 innervations on ARH PNNs in sham or in GDX groups, respectively, but did not detect any significant  
184 effect of by either chronic HFD feeding or by acute fasting (data not shown). Thus, these results  
185 indicate that endogenous gonadal hormones in both males and females are required to maintain  
186 normal PNNs in the ARH.

187

188 **Effects of sex and HFD feeding on PNN in the TE**

189 In the TE, female mice showed significantly higher WFA fluorescence intensity compared to males, as  
190 revealed by the multivariate linear regression analysis (Table 3 and Figure 3A-3E), and this sex

191 difference existed in a rostral subdivision (-1.70 mm to Bregma) and a medial-caudal subdivision (-2.18  
192 to -2.30 mm to Bregma) of the TE (Figure 3F). Using a two-way ANOVA analysis, we further found that  
193 the significant sex difference only existed in sham mice, but not in GDX mice (Figure 3G). Thus, these  
194 results indicate that gonad-intact female mice have higher PNNs in the TE than gonad-intact males.

195

196 Given the clear influence by sex, we reanalyzed the effects of HFD feeding in each sex individually and  
197 used a two-way ANOVA analysis followed by Sidak tests to further explore potential interactions  
198 between chronic HFD feeding and acute fasting. In female mice fed ad libitum, chronic HFD feeding  
199 significantly enhanced WFA fluorescence intensity in the TE compared to chow-fed females, but this  
200 effect was not observed after an overnight fasting (Figure 4A-4E). This HFD-induced increases existed in  
201 a rostral-medial subdivision (-1.70 to -1.94 mm to Bregma) of the TE (Figure 4F). On the other hand, in  
202 male mice, neither chronic HFD feeding nor acute fasting induced any changes in WFA fluorescence  
203 intensity in the TE (Figure 4G). Thus, these results indicate that chronic HFD feeding can increase PNNs  
204 in the TE in female mice but not in male mice.

205

### 206 **Other hypothalamic regions**

207 We also analyzed effects of sex, gonadal hormones, and/or dietary interventions on WFA fluorescence  
208 intensity in all other hypothalamic regions. The multivariate linear regression analysis revealed that  
209 WFA fluorescence intensity in the PVH, the PeFAH, the LH, the AH, the VMH or the DMH, was not  
210 significantly altered by these conditions (Table 4).

211

## 212 **Discussions**

213 One interesting observation of our study is that endogenous gonadal hormones are required to  
214 maintain normal PNNs in the ARH in both male and female mice. The ARH in the hypothalamus has  
215 been long believed to contain the first order neurons that respond to the peripheral signals, including  
216 leptin (18-20), insulin (21-23), ghrelin (24), asprosin (25) and estrogens (26-28). The ARH neurons  
217 include those expressing pro-opiomelanocortin (POMC) and those co-releasing agouti-related peptide  
218 (AgRP), neuropeptide Y (NPY), and GABA (referred to as AgRP neurons). POMC neurons synthesize and  
219 secrete an anorexigenic peptide,  $\alpha$ -melanocyte-stimulating hormone ( $\alpha$ -MSH) which prevents  
220 overeating and body weight gain (29,30). On the other hand, AgRP neurons are orexigenic (31), and  
221 activation of AgRP neurons promotes eating even when mice are satiated (32,33). Recent evidence also  
222 indicates that non-AgRP GABAergic neurons in the ARH provide a redundant orexigenic mechanism to  
223 drive feeding and body weight gain (34). Notably, the majority of PNNs in the ARH enmeshes AgRP  
224 neurons and GABAergic neurons, with only a small portion enmeshing POMC neurons (11).  
225 Interestingly, reduced PNNs in the ARH is found in ob/ob mice deficient in the leptin gene and in ZDF  
226 rats with a mutated leptin receptor gene (10,11), highlighting an important role of leptin signaling in  
227 maintaining the normal PNNs in the ARH. Further, the central administration of FGF1 in ZDF rats can  
228 enhance PNNs in the ARH, associated with a prolonged glucose-lowering benefit (10). Importantly,  
229 chemical disruption of PNNs significantly shortens this glucose-lowering effect of FGF1 (10). Thus,  
230 PNNs in the ARH play an essential role in regulating glucose balance.

231

232 Here we demonstrated that PNNs in the ARH are significantly reduced by removal of the ovaries in  
233 female mice, suggesting that PNNs are also regulated by ovarian hormones. Supporting this notion, co-  
234 administration of both ovarian hormones (estrogen and progesterone), which simulates pregnancy,

235 can trigger PNN formation in the medial preoptic area, a hypothalamic region normally devoid of PNNs  
236 in non-pregnant females (35). While the role of progesterone in energy and glucose homeostasis is not  
237 clear (14), estrogen is well established to provide many metabolic benefits, including suppressing food  
238 intake, increasing energy expenditure, reducing body weight gain, enhancing insulin sensitivity, and  
239 lowering blood glucose (16,36-41). Both estrogen receptor  $\alpha$  (ER $\alpha$ ) and estrogen receptor  $\beta$  (ER $\beta$ ) are  
240 implicated in mediating these metabolic effects (42-44). Notably, abundant ER $\alpha$  is expressed by POMC  
241 neurons in the ARH (45-47), to a less extent by AgRP neurons (48,49), while ER $\beta$  expression in the ARH  
242 is minimal (50). We recently showed that intact ER $\alpha$  signals are required for the glucose-sensing  
243 functions of ARH neurons (51). Further, estrogen can enhance glutamatergic synapses onto POMC  
244 neurons (52), and increase their excitability (53,54). Importantly, we previously showed that selective  
245 deletion of ER $\alpha$  from POMC-lineage neurons in female mice results in hyperphagia and obesity (26),  
246 and attenuates estrogen-induced anorexia (55). Thus, these findings, together with our current  
247 observations that PNNs are reduced by ovariectomy, suggest that PNNs in the ARH may mediate, at  
248 least a portion of, estrogenic actions on energy and glucose homeostasis, and future investigations are  
249 warranted to test this possibility. Interestingly, we also observed similar reductions of PNNs in the ARH  
250 of male mice depleted with endogenous testosterone. Consistently, it has been reported that  
251 testosterone administration can stimulate PNN formation in the forebrain of song birds (56). However,  
252 it is worth noting that testosterone can be converted into estrogen by aromatase (57). Thus, it remains  
253 to be tested whether the testosterone-induced PNN expression is mediated by testosterone per se or  
254 by converted estrogen.

255

256 Another hypothalamic region where PNNs are regulated is the TE, where female mice showed higher  
257 PNNs than males. Importantly, this sex difference was only observed in gonad-intact mice, but was

258 blunted in mice with gonads surgically removed. These results suggest that PNNs in the TE may be also  
259 regulated by gonadal hormones. Supporting this possibility, estrogen has been shown to increase  
260 oxytocin binding in the TE in rats (58), indicating potential actions of estrogen in this region. It has to be  
261 pointed out that, unlike other hypothalamic regions (e.g. the ARH, VMH, etc.), the TE has received very  
262 little attention with no more than 5 publications regarding this nucleus available in the PubMed. Early  
263 neuroanatomic studies reported that cell bodies of cholecystokinin neurons and calcitonin gene-  
264 related peptide (CGRP) neurons are found in the TE (59,60). In addition, the TE harbors nerve fibers  
265 that are immunoreactive for NPY,  $\alpha$ -MSH,  $\beta$ -endorphin, corticotropin-releasing hormone, galanin, and  
266 substance P (59,60), suggesting that the TE neurons receive a wide range of innervations and inputs  
267 from other neural populations. Interestingly, we found that in female mice only, PNNs in the TE was  
268 upregulated by chronic HFD feeding, while such effect was not observed after an overnight fasting. It is  
269 worth noting that among many hypothalamic regions expressing PNNs, the TE is the only region where  
270 PNNs can be regulated by dietary interventions. Considering that the TE receives inputs from NPY and  
271  $\alpha$ -MSH, both of which are implicated in the regulation of feeding and body weight, we suggest that TE  
272 neurons and the PNNs enmeshing these neurons may play an under-appreciated role in the context of  
273 energy homeostasis. This possibility warrants future investigations.

274

275 In summary, here we systemically assessed PNNs in multiple hypothalamic regions and explored  
276 potential regulations by sex, gonadal hormones, dietary interventions, and their interactions. We  
277 acknowledge that the limitation of the current study is its descriptive nature. However, we want to  
278 point out that our results filled a gap of knowledge in the relevant field and provided a framework to  
279 develop new hypotheses and design future studies to determine the physiological functions of  
280 hypothalamic PNNs and to explore the regulatory mechanisms. For example, the strong regulations by

281 gonadal hormones on PNNs in the ARH suggest that gonadal hormones may act through PNNs in the  
282 ARH to regulate energy and/or glucose homeostasis. Further, given that PNNs in the ARH are required  
283 to mediate metabolic benefits of FGF1 (10), the efficacy of FGF1 may need to be examined in animals  
284 depleted of gonadal hormones, which would provide important pre-clinical data for potential  
285 applications of FGF1 or its analogs in aged men with testosterone deficiency or in post-menopausal  
286 women. In addition, the dietary regulations on PNNs in the TE suggest that this understudied  
287 hypothalamic nucleus may play a role in the regulation of feeding and body weight balance.  
288 Importantly, since these dietary regulations only existed in female mice but not in male mice, future  
289 studies need to include at least female animals, if not both. Only including male animals (a common  
290 practice in many laboratories) might miss potential discoveries about PNNs in the TE or TE neurons  
291 themselves.

292

293 **Author Contributions:** NZ was involved in experimental design and most of procedures, data  
294 acquisition and analyses, and writing the manuscript. ZY assisted in data analysis. HL, MY, YH, HL, CL, LT,  
295 LW, NY, JH, NS, YY and CW assisted in in surgical procedures and production of study mice. LLC and TZ  
296 are involved in the study design and manuscript preparation. YX is the guarantors of this work and, as  
297 such, had full access to all the data in the study and take responsibility for the integrity of the data and  
298 the accuracy of the data analysis.

299

300 **Acknowledgements:** The authors are grateful for the technical assistance provided by QW Zhang, SY  
301 Huang, DH Liu, B Yuan and YR Wang. The investigators were supported by grants from the NIH  
302 (K01DK119471 to CW), USDA/CRIS (51000-064-01S to YX) and the American Heart Association  
303 (20POST35120600).

304

305 **Disclosure summary:** The authors have nothing to disclose.

306

307 **Data availability statement:** All data generated or analyzed during this study are included in this  
308 published article.

309



## 310 References

- 311 1. Farooqi IS, O'Rahilly S. The Genetics of Obesity in Humans. 2000.
- 312 2. Wahl S, Drong A, Lehne B, Loh M, Scott WR, Kunze S, Tsai PC, Ried JS, Zhang W, Yang Y,  
313 Tan S, Fiorito G, Franke L, Guarrera S, Kasela S, Kriebel J, Richmond RC, Adamo M, Afzal U,  
314 Ala-Korpela M, Albeti B, Ammerpohl O, Apperley JF, Beekman M, Bertazzi PA, Black SL,  
315 Blancher C, Bonder MJ, Brosch M, Carstensen-Kirberg M, de Craen AJ, de Lusignan S,  
316 Dehghan A, Elkalaawy M, Fischer K, Franco OH, Gaunt TR, Hampe J, Hashemi M, Isaacs A,  
317 Jenkinson A, Jha S, Kato N, Krogh V, Laffan M, Meisinger C, Meitinger T, Mok ZY, Motta V,  
318 Ng HK, Nikolakopoulou Z, Nteliopoulos G, Panico S, Pervjakova N, Prokisch H, Rathmann W,  
319 Roden M, Rota F, Rozario MA, Sandling JK, Schafmayer C, Schramm K, Siebert R, Slagboom  
320 PE, Soininen P, Stolk L, Strauch K, Tai ES, Tarantini L, Thorand B, Tigchelaar EF, Tumino R,  
321 Uitterlinden AG, van Duijn C, van Meurs JB, Vineis P, Wickremasinghe AR, Wijmenga C,  
322 Yang TP, Yuan W, Zhernakova A, Batterham RL, Smith GD, Deloukas P, Heijmans BT, Herder  
323 C, Hofman A, Lindgren CM, Milani L, van der Harst P, Peters A, Illig T, Relton CL,  
324 Waldenberger M, Jarvelin MR, Bollati V, Soong R, Spector TD, Scott J, McCarthy MI, Elliott P,  
325 Bell JT, Matullo G, Gieger C, Kooner JS, Grallert H, Chambers JC. Epigenome-wide association  
326 study of body mass index, and the adverse outcomes of adiposity. *Nature*. 2017;541(7635):81-  
327 86.
- 328 3. Locke AE, Kahali B, Berndt SI, Justice AE, Pers TH, Day FR, Powell C, Vedantam S,  
329 Buchkovich ML, Yang J, Croteau-Chonka DC, Esko T, Fall T, Ferreira T, Gustafsson S, Kutalik  
330 Z, Luan J, Magi R, Randall JC, Winkler TW, Wood AR, Workalemahu T, Faul JD, Smith JA,  
331 Zhao JH, Zhao W, Chen J, Fehrmann R, Hedman AK, Karjalainen J, Schmidt EM, Absher D,  
332 Amin N, Anderson D, Beekman M, Bolton JL, Bragg-Gresham JL, Buyske S, Demirkan A,  
333 Deng G, Ehret GB, Feenstra B, Feitosa MF, Fischer K, Goel A, Gong J, Jackson AU, Kanoni S,  
334 Kleber ME, Kristiansson K, Lim U, Lotay V, Mangino M, Leach IM, Medina-Gomez C,  
335 Medland SE, Nalls MA, Palmer CD, Pasko D, Pechlivanis S, Peters MJ, Prokopenko I, Shungin  
336 D, Stancakova A, Strawbridge RJ, Sung YJ, Tanaka T, Teumer A, Trompet S, van der Laan SW,  
337 van Setten J, Van Vliet-Ostaptchouk JV, Wang Z, Yengo L, Zhang W, Isaacs A, Albrecht E,  
338 Arnlov J, Arscott GM, Attwood AP, Bandinelli S, Barrett A, Bas IN, Bellis C, Bennett AJ, Berne  
339 C, Blagieva R, Bluher M, Bohringer S, Bonnycastle LL, Bottcher Y, Boyd HA, Bruinenberg M,  
340 Caspersen IH, Chen YI, Clarke R, Daw EW, de Craen AJM, Delgado G, Dimitriou M, Doney  
341 ASF, Eklund N, Estrada K, Eury E, Folkersen L, Fraser RM, Garcia ME, Geller F, Giedraitis V,  
342 Gigante B, Go AS, Golay A, Goodall AH, Gordon SD, Gorski M, Grabe HJ, Grallert H,  
343 Grammer TB, Grassler J, Gronberg H, Groves CJ, Gusto G, Haessler J, Hall P, Haller T,  
344 Hallmans G, Hartman CA, Hassinen M, Hayward C, Heard-Costa NL, Helmer Q, Hengstenberg  
345 C, Holmen O, Hottenga JJ, James AL, Jeff JM, Johansson A, Jolley J, Juliusdottir T, Kinnunen  
346 L, Koenig W, Koskenvuo M, Kratzer W, Laitinen J, Lamina C, Leander K, Lee NR, Lichtner P,  
347 Lind L, Lindstrom J, Lo KS, Lobbens S, Lorbeer R, Lu Y, Mach F, Magnusson PKE, Mahajan  
348 A, McArdle WL, McLachlan S, Menni C, Merger S, Mihailov E, Milani L, Moayyeri A, Monda  
349 KL, Morken MA, Mulas A, Muller G, Muller-Nurasyid M, Musk AW, Nagaraja R, Nothen MM,  
350 Nolte IM, Pilz S, Rayner NW, Renstrom F, Rettig R, Ried JS, Ripke S, Robertson NR, Rose LM,  
351 Sanna S, Scharnagl H, Scholtens S, Schumacher FR, Scott WR, Seufferlein T, Shi J, Smith AV,  
352 Smolonska J, Stanton AV, Steinthorsdottir V, Stirrups K, Stringham HM, Sundstrom J, Swertz  
353 MA, Swift AJ, Syvanen AC, Tan ST, Tayo BO, Thorand B, Thorleifsson G, Tyrer JP, Uh HW,  
354 Vandenput L, Verhulst FC, Vermeulen SH, Verweij N, Vonk JM, Waite LL, Warren HR,  
355 Waterworth D, Weedon MN, Wilkens LR, Willenborg C, Wilsgaard T, Wojczynski MK, Wong  
356 A, Wright AF, Zhang Q, Brennan EP, Choi M, Dastani Z, Drong AW, Eriksson P, Franco-  
357 Cereceda A, Gadin JR, Gharavi AG, Goddard ME, Handsaker RE, Huang J, Karpe F, Kathiresan

358 S, Keildson S, Kiryluk K, Kubo M, Lee JY, Liang L, Lifton RP, Ma B, McCarroll SA, McKnight  
359 AJ, Min JL, Moffatt MF, Montgomery GW, Murabito JM, Nicholson G, Nyholt DR, Okada Y,  
360 Perry JRB, Dorajoo R, Reinmaa E, Salem RM, Sandholm N, Scott RA, Stolk L, Takahashi A,  
361 van 't Hooft FM, Vinkhuyzen AAE, Westra HJ, Zheng W, Zondervan KT, Heath AC, Arveiler  
362 D, Bakker SJL, Beilby J, Bergman RN, Blangero J, Bovet P, Campbell H, Caulfield MJ, Cesana  
363 G, Chakravarti A, Chasman DI, Chines PS, Collins FS, Crawford DC, Cupples LA, Cusi D,  
364 Danesh J, de Faire U, den Ruijter HM, Dominiczak AF, Erbel R, Erdmann J, Eriksson JG,  
365 Farrall M, Felix SB, Ferrannini E, Ferrieres J, Ford I, Forouhi NG, Forrester T, Franco OH,  
366 Gansevoort RT, Gejman PV, Gieger C, Gottesman O, Gudnason V, Gyllensten U, Hall AS,  
367 Harris TB, Hattersley AT, Hicks AA, Hindorff LA, Hingorani AD, Hofman A, Homuth G,  
368 Hovingh GK, Humphries SE, Hunt SC, Hyponen E, Illig T, Jacobs KB, Jarvelin MR, Jockel  
369 KH, Johansen B, Jousilahti P, Jukema JW, Jula AM, Kaprio J, Kastelein JJP, Keinanen-  
370 Kiukaanniemi SM, Kiemeny LA, Knekt P, Kooner JS, Kooperberg C, Kovacs P, Kraja AT,  
371 Kumari M, Kuusisto J, Lakka TA, Langenberg C, Marchand LL, Lehtimäki T, Lyssenko V,  
372 Mannisto S, Marette A, Matise TC, McKenzie CA, McKnight B, Moll FL, Morris AD, Morris  
373 AP, Murray JC, Nelis M, Ohlsson C, Oldehinkel AJ, Ong KK, Madden PAF, Pasterkamp G,  
374 Peden JF, Peters A, Postma DS, Pramstaller PP, Price JF, Qi L, Raitakari OT, Rankinen T, Rao  
375 DC, Rice TK, Ridker PM, Rioux JD, Ritchie MD, Rudan I, Salomaa V, Samani NJ, Saramies J,  
376 Sarzynski MA, Schunkert H, Schwarz PEH, Sever P, Shuldiner AR, Sinisalo J, Stolk RP,  
377 Strauch K, Tonjes A, Tregouet DA, Tremblay A, Tremoli E, Virtamo J, Vohl MC, Volker U,  
378 Waeber G, Willemsen G, Witteman JC, Zillikens MC, Adair LS, Amouyel P, Asselbergs FW,  
379 Assimes TL, Bochud M, Boehm BO, Boerwinkle E, Bornstein SR, Bottinger EP, Bouchard C,  
380 Cauchi S, Chambers JC, Chanock SJ, Cooper RS, de Bakker PIW, Dedoussis G, Ferrucci L,  
381 Franks PW, Froguel P, Groop LC, Haiman CA, Hamsten A, Hui J, Hunter DJ, Hveem K, Kaplan  
382 RC, Kivimäki M, Kuh D, Laakso M, Liu Y, Martin NG, Marz W, Melbye M, Metspalu A,  
383 Moebus S, Munroe PB, Njolstad I, Oostra BA, Palmer CNA, Pedersen NL, Perola M, Perusse L,  
384 Peters U, Power C, Quertermous T, Rauramaa R, Rivadeneira F, Saaristo TE, Saleheen D, Sattar  
385 N, Schadt EE, Schlessinger D, Slagboom PE, Snieder H, Spector TD, Thorsteinsdottir U,  
386 Stumvoll M, Tuomilehto J, Uitterlinden AG, Uusitupa M, van der Harst P, Walker M,  
387 Wallaschofski H, Wareham NJ, Watkins H, Weir DR, Wichmann HE, Wilson JF, Zanen P,  
388 Borecki IB, Deloukas P, Fox CS, Heid IM, O'Connell JR, Strachan DP, Stefansson K, van Duijn  
389 CM, Abecasis GR, Franke L, Frayling TM, McCarthy MI, Visscher PM, Scherag A, Willer CJ,  
390 Boehnke M, Mohlke KL, Lindgren CM, Beckmann JS, Barroso I, North KE, Ingelsson E,  
391 Hirschhorn JN, Loos RJF, Speliotes EK. Genetic studies of body mass index yield new insights  
392 for obesity biology. *Nature*. 2015;518(7538):197-206.

393 4. Turcot V, Lu Y, Highland HM, Schurmann C, Justice AE, Fine RS, Bradfield JP, Esko T, Giri A,  
394 Graff M, Guo X, Hendricks AE, Karaderi T, Lempradl A, Locke AE, Mahajan A, Marouli E,  
395 Sivapalaratnam S, Young KL, Alfred T, Feitosa MF, Masca NGD, Manning AK, Medina-Gomez  
396 C, Mudgal P, Ng MCY, Reiner AP, Vedantam S, Willems SM, Winkler TW, Abecasis G, Aben  
397 KK, Alam DS, Alharthi SE, Allison M, Amouyel P, Asselbergs FW, Auer PL, Balkau B, Bang  
398 LE, Barroso I, Bastarache L, Benn M, Bergmann S, Bielak LF, Blüher M, Boehnke M, Boeing  
399 H, Boerwinkle E, Böger CA, Bork-Jensen J, Bots ML, Bottinger EP, Bowden DW, Brandslund I,  
400 Breen G, Brilliant MH, Broer L, Brumat M, Burt AA, Butterworth AS, Campbell PT, Cappellani  
401 S, Carey DJ, Catamo E, Caulfield MJ, Chambers JC, Chasman DI, Chen YI, Chowdhury R,  
402 Christensen C, Chu AY, Cocca M, Collins FS, Cook JP, Corley J, Corominas Galbany J, Cox  
403 AJ, Crosslin DS, Cuellar-Partida G, D'Eustacchio A, Danesh J, Davies G, Bakker PIW, Groot  
404 MCH, Mutsert R, Deary IJ, Dedoussis G, Demerath EW, Heijer M, Hollander AI, Ruijter HM,  
405 Dennis JG, Denny JC, Di Angelantonio E, Drenos F, Du M, Dubé MP, Dunning AM, Easton DF,  
406 Edwards TL, Ellinghaus D, Ellinor PT, Elliott P, Evangelou E, Farmaki AE, Farooqi IS, Faul JD,

- 407 Fauser S, Feng S, Ferrannini E, Ferrieres J, Florez JC, Ford I, Fornage M, Franco OH, Franke A,  
408 Franks PW, Friedrich N, Frikke-Schmidt R, Galesloot TE, Gan W, Gandin I, Gasparini P,  
409 Gibson J, Giedraitis V, Gjesing AP, Gordon-Larsen P, Gorski M, Grabe HJ, Grant SFA, Grarup  
410 N, Griffiths HL, Grove ML, Gudnason V, Gustafsson S, Haessler J, Hakonarson H,  
411 Hammerschlag AR, Hansen T, Harris KM, Harris TB, Hattersley AT, Have CT, Hayward C, He  
412 L, Heard-Costa NL, Heath AC, Heid IM, Helgeland Ø, Hernesniemi J, Hewitt AW, Holmen OL,  
413 Hovingh GK, Howson JMM, Hu Y, Huang PL, Huffman JE, Ikram MA, Ingelsson E, Jackson  
414 AU, Jansson JH, Jarvik GP, Jensen GB, Jia Y, Johansson S, Jørgensen ME, Jørgensen T, Jukema  
415 JW, Kahali B, Kahn RS, Kähönen M, Kamstrup PR, Kanoni S, Kaprio J, Karaleftheri M, Kardia  
416 SLR, Karpe F, Kathiresan S, Kee F, Kiemeny LA, Kim E, Kitajima H, Komulainen P, Kooner  
417 JS, Kooperberg C, Korhonen T, Kovacs P, Kuivaniemi H, Kutalik Z, Kuulasmaa K, Kuusisto J,  
418 Laakso M, Lakka TA, Lamparter D, Lange EM, Lange LA, Langenberg C, Larson EB, Lee NR,  
419 Lehtimäki T, Lewis CE, Li H, Li J, Li-Gao R, Lin H, Lin KH, Lin LA, Lin X, Lind L, Lindström  
420 J, Linneberg A, Liu CT, Liu DJ, Liu Y, Lo KS, Lophatananon A, Lotery AJ, Loukola A, Luan J,  
421 Lubitz SA, Lyytikäinen LP, Männistö S, Marenne G, Mazul AL, McCarthy MI, McKean-  
422 Cowdin R, Medland SE, Meidtner K, Milani L, Mistry V, Mitchell P, Mohlke KL, Moilanen L,  
423 Moitry M, Montgomery GW, Mook-Kanamori DO, Moore C, Mori TA, Morris AD, Morris AP,  
424 Müller-Nurasyid M, Munroe PB, Nalls MA, Narisu N, Nelson CP, Neville M, Nielsen SF, Nikus  
425 K, Njølstad PR, Nordestgaard BG, Nyholt DR, O'Connel JR, O'Donoghue ML, Olde Loohuis  
426 LM, Ophoff RA, Owen KR, Packard CJ, Padmanabhan S, Palmer CNA, Palmer ND, Pasterkamp  
427 G, Patel AP, Pattie A, Pedersen O, Peissig PL, Peloso GM, Pennell CE, Perola M, Perry JA,  
428 Perry JRB, Pers TH, Person TN, Peters A, Petersen ERB, Peyser PA, Pirie A, Polasek O,  
429 Polderman TJ, Puolijoki H, Raitakari OT, Rasheed A, Rauramaa R, Reilly DF, Renström F,  
430 Rheinberger M, Ridker PM, Rioux JD, Rivas MA, Roberts DJ, Robertson NR, Robino A,  
431 Rolandsson O, Rudan I, Ruth KS, Saleheen D, Salomaa V, Samani NJ, Sapkota Y, Sattar N,  
432 Schoen RE, Schreiner PJ, Schulze MB, Scott RA, Segura-Lepe MP, Shah SH, Sheu WH, Sim X,  
433 Slater AJ, Small KS, Smith AV, Southam L, Spector TD, Speliotes EK, Starr JM, Stefansson K,  
434 Steinthorsdottir V, Stirrups KE, Strauch K, Stringham HM, Stumvoll M, Sun L, Surendran P,  
435 Swift AJ, Tada H, Tansey KE, Tardif JC, Taylor KD, Teumer A, Thompson DJ, Thorleifsson G,  
436 Thorsteinsdottir U, Thuesen BH, Tönjes A, Tromp G, Trompet S, Tsafantakis E, Tuomilehto J,  
437 Tybjaerg-Hansen A, Tyrer JP, Uher R, Uitterlinden AG, Uusitupa M, Laan SW, Duijn CM,  
438 Leeuwen N, van Setten J, Vanhala M, Varbo A, Varga TV, Varma R, Velez Edwards DR,  
439 Vermeulen SH, Veronesi G, Vestergaard H, Vitart V, Vogt TF, Völker U, Vuckovic D,  
440 Wagenknecht LE, Walker M, Wallentin L, Wang F, Wang CA, Wang S, Wang Y, Ware EB,  
441 Wareham NJ, Warren HR, Waterworth DM, Wessel J, White HD, Willer CJ, Wilson JG, Witte  
442 DR, Wood AR, Wu Y, Yaghootkar H, Yao J, Yao P, Yerges-Armstrong LM, Young R, Zeggini  
443 E, Zhan X, Zhang W, Zhao JH, Zhao W, Zhao W, Zhou W, Zondervan KT, Rotter JI, Pospisilik  
444 JA, Rivadeneira F, Borecki IB, Deloukas P, Frayling TM, Lettre G, North KE, Lindgren CM,  
445 Hirschhorn JN, Loos RJJ. Protein-altering variants associated with body mass index implicate  
446 pathways that control energy intake and expenditure in obesity. *Nat Genet.* 2018;50(1):26-41.
- 447 5. Hetherington AW, Ranson SW. Hypothalamic lesions and adiposity in the rat. *The Anatomical*  
448 *Record.* 1940;78:149-172.
  - 449 6. Elmquist JK, Elias CF, Saper CB. From lesions to leptin: hypothalamic control of food intake  
450 and body weight. *Neuron.* 1999;22(2):221-232.
  - 451 7. Morton GJ, Cummings DE, Baskin DG, Barsh GS, Schwartz MW. Central nervous system  
452 control of food intake and body weight. *Nature.* 2006;443(7109):289-295.
  - 453 8. Yang Y, Xu Y. The central melanocortin system and human obesity. *J Mol Cell Biol.*  
454 2021;12(10):785-797.

- 455 9. Testa D, Prochiantz A, Di Nardo AA. Perineuronal nets in brain physiology and disease. *Semin*  
456 *Cell Dev Biol.* 2019;89:125-135.
- 457 10. Alonge KM, Mirzadeh Z, Scarlett JM, Logsdon AF, Brown JM, Cabrales E, Chan CK, Kaiyala  
458 KJ, Bentsen MA, Banks WA, Guttman M, Wight TN, Morton GJ, Schwartz MW. Hypothalamic  
459 perineuronal net assembly is required for sustained diabetes remission induced by fibroblast  
460 growth factor 1 in rats. *Nat Metab.* 2020;2(10):1025-1033.
- 461 11. Mirzadeh Z, Alonge KM, Cabrales E, Herranz-Perez V, Scarlett JM, Brown JM, Hassouna R,  
462 Matsen ME, Nguyen HT, Garcia-Verdugo JM, Zeltser LM, Schwartz MW. Perineuronal Net  
463 Formation during the Critical Period for Neuronal Maturation in the Hypothalamic Arcuate  
464 Nucleus. *Nat Metab.* 2019;1(2):212-221.
- 465 12. Horii-Hayashi N, Sasagawa T, Hashimoto T, Kaneko T, Takeuchi K, Nishi M. A newly  
466 identified mouse hypothalamic area having bidirectional neural connections with the lateral  
467 septum: the perifornical area of the anterior hypothalamus rich in chondroitin sulfate  
468 proteoglycans. *Eur J Neurosci.* 2015;42(6):2322-2334.
- 469 13. Kammel LG, Correa SM. Selective sexual differentiation of neurone populations may contribute  
470 to sex-specific outputs of the ventromedial nucleus of the hypothalamus. *J Neuroendocrinol.*  
471 2020;32(1):e12801.
- 472 14. Wang C, Xu Y. Mechanisms for Sex Differences in Energy Homeostasis. *J Mol Endocrinol.*  
473 2019;62(2):R129-R143.
- 474 15. Slaker ML, Harkness JH, Sorg BA. A standardized and automated method of perineuronal net  
475 analysis using *Wisteria floribunda* agglutinin staining intensity. *IBRO Rep.* 2016;1:54-60.
- 476 16. Riant E, Waget A, Cogo H, Arnal JF, Burcelin R, Gourdy P. Estrogens protect against high-fat  
477 diet-induced insulin resistance and glucose intolerance in mice. *Endocrinology.*  
478 2009;150(5):2109-2117.
- 479 17. Moverare-Skrtic S, Venken K, Andersson N, Lindberg MK, Svensson J, Swanson C,  
480 Vanderschueren D, Oscarsson J, Gustafsson JA, Ohlsson C. Dihydrotestosterone treatment  
481 results in obesity and altered lipid metabolism in orchidectomized mice. *Obesity (Silver Spring).*  
482 2006;14(4):662-672.
- 483 18. Balthasar N, Coppari R, McMinn J, Liu SM, Lee CE, Tang V, Kenny CD, McGovern RA, Chua  
484 SC, Jr., Elmquist JK, Lowell BB. Leptin receptor signaling in POMC neurons is required for  
485 normal body weight homeostasis. *Neuron.* 2004;42(6):983-991.
- 486 19. Caron A, Dungan Lemko HM, Castorena CM, Fujikawa T, Lee S, Lord CC, Ahmed N, Lee CE,  
487 Holland WL, Liu C, Elmquist JK. POMC neurons expressing leptin receptors coordinate  
488 metabolic responses to fasting via suppression of leptin levels. *Elife.* 2018;7.
- 489 20. Xu J, Bartolome CL, Low CS, Yi X, Chien CH, Wang P, Kong D. Genetic identification of  
490 leptin neural circuits in energy and glucose homeostases. *Nature.* 2018;556(7702):505-509.
- 491 21. Qiu J, Zhang C, Borgquist A, Nestor CC, Smith AW, Bosch MA, Ku S, Wagner EJ, Ronnekleiv  
492 OK, Kelly MJ. Insulin excites anorexigenic proopiomelanocortin neurons via activation of  
493 canonical transient receptor potential channels. *Cell Metab.* 2014;19(4):682-693.
- 494 22. Konner AC, Janoschek R, Plum L, Jordan SD, Rother E, Ma X, Xu C, Enriori P, Hampel B,  
495 Barsh GS, Kahn CR, Cowley MA, Ashcroft FM, Bruning JC. Insulin action in AgRP-expressing  
496 neurons is required for suppression of hepatic glucose production. *Cell Metab.* 2007;5(6):438-  
497 449.
- 498 23. Hill JW, Elias CF, Fukuda M, Williams KW, Berglund ED, Holland WL, Cho YR, Chuang JC,  
499 Xu Y, Choi M, Lauzon D, Lee CE, Coppari R, Richardson JA, Zigman JM, Chua S, Scherer PE,  
500 Lowell BB, Bruning JC, Elmquist JK. Direct insulin and leptin action on pro-opiomelanocortin  
501 neurons is required for normal glucose homeostasis and fertility. *Cell Metab.* 2010;11(4):286-  
502 297.

- 503 24. Wang Q, Liu C, Uchida A, Chuang JC, Walker A, Liu T, Osborne-Lawrence S, Mason BL,  
504 Mosher C, Berglund ED, Elmquist JK, Zigman JM. Arcuate AgRP neurons mediate orexigenic  
505 and glucoregulatory actions of ghrelin. *Mol Metab.* 2014;3(1):64-72.
- 506 25. Duerrschmid C, He Y, Wang C, Li C, Bournat JC, Romere C, Saha PK, Lee ME, Phillips KJ,  
507 Jain M, Jia P, Zhao Z, Farias M, Wu Q, Milewicz DM, Sutton VR, Moore DD, Butte NF,  
508 Krashes MJ, Xu Y, Chopra AR. Asprosin is a centrally acting orexigenic hormone. *Nat Med.*  
509 2017;23(12):1444-1453.
- 510 26. Xu Y, Nedungadi TP, Zhu L, Sobhani N, Irani BG, Davis KE, Zhang X, Zou F, Gent LM,  
511 Hahner LD, Khan SA, Elias CF, Elmquist JK, Clegg DJ. Distinct hypothalamic neurons mediate  
512 estrogenic effects on energy homeostasis and reproduction. *Cell Metab.* 2011;14(4):453-465.
- 513 27. Herber CB, Krause WC, Wang L, Bayrer JR, Li A, Schmitz M, Fields A, Ford B, Zhang Z, Reid  
514 MS, Nomura DK, Nissenson RA, Correa SM, Ingraham HA. Estrogen signaling in arcuate Kiss1  
515 neurons suppresses a sex-dependent female circuit promoting dense strong bones. *Nat Commun.*  
516 2019;10(1):163.
- 517 28. Roepke TA, Malyala A, Bosch MA, Kelly MJ, Ronnekleiv OK. Estrogen regulation of genes  
518 important for K<sup>+</sup> channel signaling in the arcuate nucleus. *Endocrinology.* 2007;148(10):4937-  
519 4951.
- 520 29. Xu AW, Kaelin CB, Morton GJ, Ogimoto K, Stanhope K, Graham J, Baskin DG, Havel P,  
521 Schwartz MW, Barsh GS. Effects of hypothalamic neurodegeneration on energy balance. *PLoS*  
522 *Biol.* 2005;3(12):e415.
- 523 30. Yaswen L, Diehl N, Brennan MB, Hochgeschwender U. Obesity in the mouse model of pro-  
524 opiomelanocortin deficiency responds to peripheral melanocortin. *Nat Med.* 1999;5(9):1066-  
525 1070.
- 526 31. Wu Q, Boyle MP, Palmiter RD. Loss of GABAergic signaling by AgRP neurons to the  
527 parabrachial nucleus leads to starvation. *Cell.* 2009;137(7):1225-1234.
- 528 32. Krashes MJ, Koda S, Ye C, Rogan SC, Adams AC, Cusher DS, Maratos-Flier E, Roth BL,  
529 Lowell BB. Rapid, reversible activation of AgRP neurons drives feeding behavior in mice. *J Clin*  
530 *Invest.* 2011.
- 531 33. Aponte Y, Atasoy D, Sternson SM. AGRP neurons are sufficient to orchestrate feeding behavior  
532 rapidly and without training. *Nat Neurosci.* 2011;14(3):351-355.
- 533 34. Zhu C, Jiang Z, Xu Y, Cai ZL, Jiang Q, Xue M, Arenkiel BR, Wu Q, Shu G, Tong Q. Profound  
534 and redundant functions of arcuate neurons in obesity development. *Nat Metab.* 2020;2(8):763-  
535 774.
- 536 35. Uriarte N, Ferreno M, Mendez D, Nogueira J. Reorganization of perineuronal nets in the medial  
537 Preoptic Area during the reproductive cycle in female rats. *Sci Rep.* 2020;10(1):5479.
- 538 36. Blaustein JD, Wade GN. Ovarian influences on the meal patterns of female rats. *Physiol Behav.*  
539 1976;17(2):201-208.
- 540 37. Drewett RF. Sexual behaviour and sexual motivation in the female rat. *Nature.*  
541 1973;242(5398):476-477.
- 542 38. Geary N, Asarian L, Korach KS, Pfaff DW, Ogawa S. Deficits in E2-dependent control of  
543 feeding, weight gain, and cholecystikinin satiation in ER-alpha null mice. *Endocrinology.*  
544 2001;142(11):4751-4757.
- 545 39. Wallen WJ, Belanger MP, Wittnich C. Sex hormones and the selective estrogen receptor  
546 modulator tamoxifen modulate weekly body weights and food intakes in adolescent and adult  
547 rats. *J Nutr.* 2001;131(9):2351-2357.
- 548 40. Paladini CA, Roeper J. Generating bursts (and pauses) in the dopamine midbrain neurons.  
549 *Neuroscience.* 2014;282:109-121.

- 550 41. Rogers NH, Perfield JW, 2nd, Strissel KJ, Obin MS, Greenberg AS. Reduced energy expenditure  
551 and increased inflammation are early events in the development of ovariectomy-induced obesity.  
552 *Endocrinology*. 2009.
- 553 42. Okura T, Koda M, Ando F, Niino N, Ohta S, Shimokata H. Association of polymorphisms in the  
554 estrogen receptor alpha gene with body fat distribution. *Int J Obes Relat Metab Disord*.  
555 2003;27(9):1020-1027.
- 556 43. Heine PA, Taylor JA, Iwamoto GA, Lubahn DB, Cooke PS. Increased adipose tissue in male and  
557 female estrogen receptor-alpha knockout mice. *Proc Natl Acad Sci U S A*. 2000;97(23):12729-  
558 12734.
- 559 44. Foryst-Ludwig A, Clemenz M, Hohmann S, Hartge M, Sprang C, Frost N, Krikov M, Bhanot S,  
560 Barros R, Morani A, Gustafsson JA, Unger T, Kintscher U. Metabolic actions of estrogen  
561 receptor beta (ERbeta) are mediated by a negative cross-talk with PPARgamma. *PLoS Genet*.  
562 2008;4(6):e1000108.
- 563 45. Miller MM, Tousignant P, Yang U, Pedvis S, Billiar RB. Effects of age and long-term  
564 ovariectomy on the estrogen-receptor containing subpopulations of beta-endorphin-  
565 immunoreactive neurons in the arcuate nucleus of female C57BL/6J mice. *Neuroendocrinology*.  
566 1995;61(5):542-551.
- 567 46. Attia E. Anorexia nervosa: current status and future directions. *Annu Rev Med*. 2010;61:425-435.
- 568 47. de Souza FS, Nasif S, Lopez-Leal R, Levi DH, Low MJ, Rubinsten M. The estrogen receptor  
569 alpha colocalizes with proopiomelanocortin in hypothalamic neurons and binds to a conserved  
570 motif present in the neuron-specific enhancer nPE2. *Eur J Pharmacol*. 2011;660(1):181-187.
- 571 48. Roepke TA, Qiu J, Smith AW, Ronnekleiv OK, Kelly MJ. Fasting and 17beta-estradiol  
572 differentially modulate the M-current in neuropeptide Y neurons. *J Neurosci*.  
573 2011;31(33):11825-11835.
- 574 49. Olofsson LE, Pierce AA, Xu AW. Functional requirement of AgRP and NPY neurons in ovarian  
575 cycle-dependent regulation of food intake. *Proc Natl Acad Sci U S A*. 2009;106(37):15932-  
576 15937.
- 577 50. Merchenthaler I, Lane MV, Numan S, Dellovade TL. Distribution of estrogen receptor alpha and  
578 beta in the mouse central nervous system: in vivo autoradiographic and immunocytochemical  
579 analyses. *J Comp Neurol*. 2004;473(2):270-291.
- 580 51. Yu K, He Y, Hyseni I, Pei Z, Yang Y, Xu P, Cai X, Liu H, Qu N, Yu M, Liang C, Yang T, Wang  
581 J, Gourdy P, Arnal JF, Lenfant F, Xu Y, Wang C. 17beta-estradiol promotes acute refeeding in  
582 hungry mice via membrane-initiated ERalpha signaling. *Mol Metab*. 2020;42:101053.
- 583 52. Gao Q, Mezei G, Nie Y, Rao Y, Choi CS, Bechmann I, Leranth C, Toran-Allerand D, Priest CA,  
584 Roberts JL, Gao XB, Mobbs C, Shulman GI, Diano S, Horvath TL. Anorectic estrogen mimics  
585 leptin's effect on the rewiring of melanocortin cells and Stat3 signaling in obese animals. *Nat*  
586 *Med*. 2007;13(1):89-94.
- 587 53. Malyala A, Zhang C, Bryant DN, Kelly MJ, Ronnekleiv OK. PI3K signaling effects in  
588 hypothalamic neurons mediated by estrogen. *J Comp Neurol*. 2008;506(6):895-911.
- 589 54. Saito K, Cao X, He Y, Xu Y. Progress in the molecular understanding of central regulation of  
590 body weight by estrogens. *Obesity (Silver Spring)*. 2015;23(5):919-926.
- 591 55. Zhu L, Xu P, Cao X, Yang Y, Hinton AO, Jr., Xia Y, Saito K, Yan X, Zou F, Ding H, Wang C,  
592 Yan C, Saha P, Khan SA, Zhao J, Fukuda M, Tong Q, Clegg DJ, Chan L, Xu Y. The ERalpha-  
593 PI3K Cascade in Proopiomelanocortin Progenitor Neurons Regulates Feeding and Glucose  
594 Balance in Female Mice. *Endocrinology*. 2015;156(12):4474-4491.
- 595 56. Cornez G, Shevchouk OT, Ghorbanpoor S, Ball GF, Cornil CA, Balthazart J. Testosterone  
596 stimulates perineuronal nets development around parvalbumin cells in the adult canary brain in  
597 parallel with song crystallization. *Horm Behav*. 2020;119:104643.

- 598 57. Henderson KM, Swanston IA. Androgen aromatization by luteinized bovine granulosa cells in  
599 tissue culture. *J Reprod Fertil.* 1978;52(1):131-134.
- 600 58. Kremarik P, Freund-Mercier MJ, Stoeckel ME. Estrogen-sensitive oxytocin binding sites are  
601 differently regulated by progesterone in the telencephalon and the hypothalamus of the rat. *J*  
602 *Neuroendocrinol.* 1995;7(4):281-289.
- 603 59. Lantos TA, Gorcs TJ, Palkovits M. Immunohistochemical localization of calcitonin gene-related  
604 peptide in the terete nucleus of the rat hypothalamus. *Neurobiology (Bp).* 1996;4(1-2):73-84.
- 605 60. Lantos TA, Gorcs TJ, Palkovits M. Immunohistochemical mapping of neuropeptides in the  
606 premamillary region of the hypothalamus in rats. *Brain Res Brain Res Rev.* 1995;20(2):209-249.  
607  
608

609 **Tables**

610 **Table 1. Effects of sex, GDX and diet on various metabolic parameters.**

|                                              | B       | p value      | 95.0% Confidence Interval |             |
|----------------------------------------------|---------|--------------|---------------------------|-------------|
|                                              |         |              | Lower Bound               | Upper Bound |
| <b>Cumulative intake (calorie)</b>           |         |              |                           |             |
| Female vs Male <sup>#</sup>                  | -13.234 | 0.298        | -38.542                   | 12.075      |
| GDX vs Sham <sup>##</sup>                    | 7.461   | 0.554        | -17.798                   | 32.721      |
| High fat diet vs Regular chow <sup>###</sup> | 56.660  | p < 0.001*** | 31.306                    | 82.013      |
| <b>Body weight change (g)</b>                |         |              |                           |             |
| Female vs Male <sup>#</sup>                  | -0.448  | 0.620        | -2.255                    | 1.359       |
| GDX vs Sham <sup>##</sup>                    | 0.532   | 0.556        | -1.275                    | 2.339       |
| High fat diet vs Regular chow <sup>###</sup> | 5.389   | p < 0.001*** | 3.582                     | 7.196       |
| <b>Blood glucose change (mg/dL)</b>          |         |              |                           |             |
| Female vs Male <sup>#</sup>                  | 13.141  | 0.128        | -3.915                    | 30.198      |
| GDX vs Sham <sup>##</sup>                    | 1.143   | 0.893        | -15.913                   | 18.200      |
| High fat diet vs Regular chow <sup>###</sup> | 37.838  | p < 0.001*** | 20.782                    | 54.894      |
| <b>Fat change (g)</b>                        |         |              |                           |             |
| Female vs Male <sup>#</sup>                  | -2.052  | 0.012*       | -3.633                    | -0.471      |
| GDX vs Sham <sup>##</sup>                    | 1.495   | 0.063        | -0.085                    | 3.076       |
| P for the interaction of Sex and GDX         |         | 0.451        |                           |             |
| High fat diet vs Regular Chow <sup>###</sup> | 5.539   | p < 0.001*** | 3.958                     | 7.120       |
| P for the interaction of Sex and Diet        |         | 0.226        |                           |             |
| <b>Lean change (g)</b>                       |         |              |                           |             |
| Female vs Male <sup>#</sup>                  | 1.405   | p < 0.001*** | 0.828                     | 1.983       |
| GDX vs Sham <sup>##</sup>                    | -0.805  | 0.007**      | -1.383                    | -0.228      |
| P for the interaction of Sex and GDX         |         | p < 0.001*** |                           |             |
| High fat diet vs Regular chow <sup>###</sup> | -0.107  | 0.710        | -0.684                    | 0.470       |

611  
612 # Here we use male mice as reference. ## Here we use sham mice as reference. ### Here we use  
613 regular chow as reference.

614

615



616 **Table 2. Effects of sex, GDX, diet and fasting on PNNs in the ARH.**

|                                  | B          | p value | 95.0% Confidence Interval |             |
|----------------------------------|------------|---------|---------------------------|-------------|
|                                  |            |         | Lower Bound               | Upper Bound |
| Female vs Male#                  | 3216.040   | 0.710   | -14091.082                | 20523.162   |
| GDX vs Sham##                    | -28525.814 | 0.002** | -45832.935                | -11218.692  |
| High fat diet vs Regular chow### | 5478.986   | 0.527   | -11858.261                | 22816.234   |
| Fast vs Ab libitum####           | 1070.635   | 0.902   | -16266.612                | 18407.883   |

617 # Here we use male mice as reference. ## Here we use sham mice as reference. ### Here we use

618 regular chow as reference. ####Here we use fed mice as reference.

619

620

621

622 **Table 3. Effects of sex, GDX, diet and nutritional status on PNNs in the TE.**

|                                              | B         | p value | 95.0% Confidence Interval |             |
|----------------------------------------------|-----------|---------|---------------------------|-------------|
|                                              |           |         | Lower Bound               | Upper Bound |
| Female vs Male <sup>#</sup>                  | 37265.520 | 0.004** | 12278.584                 | 62252.456   |
| GDX vs Sham <sup>##</sup>                    | 8878.365  | 0.478   | -16108.572                | 33865.301   |
| High fat diet vs Regular chow <sup>###</sup> | 3443.149  | 0.783   | -21587.281                | 28473.579   |
| Fast vs Ab libitum <sup>####</sup>           | -2328.269 | 0.852   | -27358.698                | 22702.161   |

623 # Here we use male mice as reference. ## Here we use sham mice as reference. ### Here we use

624 regular chow as reference. #### Here we use fed mice as reference.

625

626

627 **Table 4. Effects of sex, GDX, diet and nutritional status on PNNs in the PVH, PeFAH, LH, AH, VMH and**  
 628 **DMH.**

|                                              | B          | p value | 95.0% Confidence Interval |             |
|----------------------------------------------|------------|---------|---------------------------|-------------|
|                                              |            |         | Lower Bound               | Upper Bound |
| <b>PVH</b>                                   |            |         |                           |             |
| Female vs Male <sup>#</sup>                  | 1093.487   | 0.785   | -6950.901                 | 9137.874    |
| GDX vs Sham <sup>##</sup>                    | 1801.150   | 0.649   | -6123.285                 | 9725.586    |
| High fat diet vs Regular chow <sup>###</sup> | 7111.050   | 0.082   | -948.109                  | 15170.209   |
| Fast vs Ab libitum <sup>####</sup>           | 1437.498   | 0.721   | -6621.661                 | 9496.657    |
| <b>PeFAH</b>                                 |            |         |                           |             |
| Female vs Male <sup>#</sup>                  | 10127.575  | 0.447   | -16501.677                | 36756.827   |
| GDX vs Sham <sup>##</sup>                    | 12003.295  | 0.361   | -14228.883                | 38235.473   |
| High fat diet vs Regular chow <sup>###</sup> | 12968.496  | 0.332   | -13709.655                | 39646.646   |
| Fast vs Ab libitum <sup>####</sup>           | 3879.818   | 0.771   | -22798.333                | 30557.969   |
| <b>LH</b>                                    |            |         |                           |             |
| Female vs Male <sup>#</sup>                  | 48723.960  | 0.118   | -12839.004                | 110286.924  |
| GDX vs Sham <sup>##</sup>                    | 25737.089  | 0.397   | -34907.897                | 86382.074   |
| High fat diet vs Regular chow <sup>###</sup> | -22043.519 | 0.475   | -83719.530                | 39632.491   |
| Fast vs Ab libitum <sup>####</sup>           | -17950.520 | 0.560   | -79626.531                | 43725.490   |
| <b>AH</b>                                    |            |         |                           |             |
| Female vs Male <sup>#</sup>                  | 9830.509   | 0.347   | -11017.746                | 30678.764   |
| GDX vs Sham <sup>##</sup>                    | 6991.586   | 0.496   | -13545.796                | 27528.969   |
| High fat diet vs Regular chow <sup>###</sup> | 6079.521   | 0.560   | -14807.017                | 26966.059   |
| Fast vs Ab libitum <sup>####</sup>           | 599.040    | 0.954   | -20287.498                | 21485.578   |
| <b>VMH</b>                                   |            |         |                           |             |
| Female vs Male <sup>#</sup>                  | 8833.935   | 0.639   | -28921.823                | 46589.693   |
| GDX vs Sham <sup>##</sup>                    | 6705.915   | 0.718   | -30486.859                | 43898.688   |

---

|                                              |            |       |            |           |
|----------------------------------------------|------------|-------|------------|-----------|
| High fat diet vs Regular chow <sup>###</sup> | -14866.204 | 0.432 | -52691.292 | 22958.884 |
| Fast vs Ab libitum <sup>####</sup>           | -19095.426 | 0.314 | -56920.514 | 18729.662 |
| <b>DMH</b>                                   |            |       |            |           |
| Female vs Male <sup>#</sup>                  | -2075.195  | 0.135 | -4826.375  | 675.985   |
| GDX vs Sham <sup>##</sup>                    | 267.179    | 0.843 | -2442.978  | 2977.336  |
| High fat diet vs Regular chow <sup>###</sup> | 1587.169   | 0.252 | -1169.064  | 4343.401  |
| Fast vs Ab libitum <sup>####</sup>           | -487.298   | 0.723 | -3243.531  | 2268.934  |

---

629 # Here we use male mice as reference. ## Here we use sham mice as reference. ### Here we use  
630 regular chow as reference. #### Here we use fed mice as reference.

631

632

633 **Figure Legends**

634 **Figure 1. Distribution of WFA-labelled PNNs in mouse hypothalamus.** Representative fluorescent  
635 microscopic images showing WFA-labelled PNNs (green) and DAPI counterstaining (purple) in a series  
636 of coronal brain sections at the level of -0.82 mm (A), -1.34 mm (B), -1.58 mm (C) and -1.82 mm (D)  
637 relative to the Bregma. Scale bars = 200  $\mu$ m. AH, the anterior hypothalamus; ARH, the arcuate  
638 hypothalamic nucleus; DMH, the dorsomedial hypothalamic nucleus; LH, the lateral hypothalamus;  
639 PeFAH, the perifornical area of the anterior hypothalamus (PeFAH); PVH, the paraventricular  
640 hypothalamic nucleus; TE, the terete hypothalamic nucleus; VMH, the ventromedial hypothalamic  
641 nucleus.

642

643 **Figure 2. GDX reduces PNNs in the ARH.** (A-D) Representative fluorescence microscopic images  
644 showing WFA-labelled PNNs (green) in the ARH of female sham (A), female OVX (B), male sham (C) and  
645 male CAST mice (D). Scale bars = 200  $\mu$ m. ARH, the arcuate hypothalamic nucleus. (E) Quantification of  
646 the total WFA fluorescence intensity in the ARH from sham vs. GDX mice. N = 24 or 25 mice per group.  
647 Data are presented with mean  $\pm$  SEM with individual data points. \*\*, P<0.01 in unpaired two-tailed  
648 Student's t-tests. (F) Quantification of the WFA fluorescence intensity at various rostral-caudal levels of  
649 the ARH from sham vs. GDX mice. N = 24 or 25 mice per group. Data are presented with mean  $\pm$  SEM.  
650 \*, P<0.05 and \*\*, P<0.01 in unpaired two-tailed Student's t-tests at each level. (G) Quantification of the  
651 total WFA fluorescence intensity in the ARH from female or male mice with sham or GDX surgeries. N =  
652 12 or 13 mice per group. Data are presented with mean  $\pm$  SEM with individual data points. \*, P<0.05 in  
653 two-way ANOVA analysis followed by Holm-Sidak post hoc tests.

654

655

656 **Figure 3. PNNs in the TE display a sexual dimorphism.** (A-D) Representative fluorescence microscopic  
657 images showing WFA-labelled PNNs (green) in the TE of female sham (A), male sham (B), female OVX  
658 (C), and male CAST mice (D). Scale bars = 200  $\mu$ m. TE, the terete hypothalamic nucleus. (E)  
659 Quantification of the total WFA fluorescence intensity in the TE from female vs. male mice. N = 24 or  
660 25 mice per group. Data are presented with mean  $\pm$  SEM with individual data points. \*\*, P<0.01 in  
661 unpaired two-tailed Student's t-tests. (F) Quantification of the WFA fluorescence intensity at various  
662 rostral-caudal levels of the TE from female vs. male mice. N = 24 or 25 mice per group. Data are  
663 presented with mean  $\pm$  SEM. \*, P<0.05 and \*\*, P<0.01 in unpaired two-tailed Student's t-tests at each  
664 level. (G) Quantification of the total WFA fluorescence intensity in the TE from female or male mice  
665 with sham or GDX surgeries. N = 12 or 13 mice per group. Data are presented with mean  $\pm$  SEM with  
666 individual data points. \*\*, P<0.01 in two way ANOVA analysis followed by Sidak post hoc tests.

667

668 **Figure 4. HFD feeding increases TE PNNs in female mice.** (A-D) Representative fluorescence  
669 microscopic images showing WFA-labelled PNNs (green) in the TE of female mice that were fed chow  
670 ad libitum (A), HFD ad libitum sham (B), chow after an overnight fasting (C), and HFD after an overnight  
671 fasting (D). Scale bars = 200  $\mu$ m. TE, the terete hypothalamic nucleus. (E) Quantification of the total  
672 WFA fluorescence intensity in the TE from female mice with various dietary interventions. N = 6 mice  
673 per group. Data are presented with mean  $\pm$  SEM with individual data points. \*, P<0.05 in two-way  
674 ANOVA analysis followed by Sidak post hoc tests. (F) Quantification of the WFA fluorescence intensity  
675 at various rostral-caudal levels of the TE from female mice fed with chow or HFD ad libitum. N = 6 mice  
676 per group. Data are presented with mean  $\pm$  SEM. \*, P<0.05 and \*\*, P<0.01 in unpaired two-tailed  
677 Student's t-tests at each level. (G) Quantification of the total WFA fluorescence intensity in the TE from

678 male mice with various dietary interventions. N = 6 or 7 mice per group. Data are presented with mean  
679  $\pm$  SEM with individual data points. No significance was detected by in two way ANOVA analysis.

Figure 1

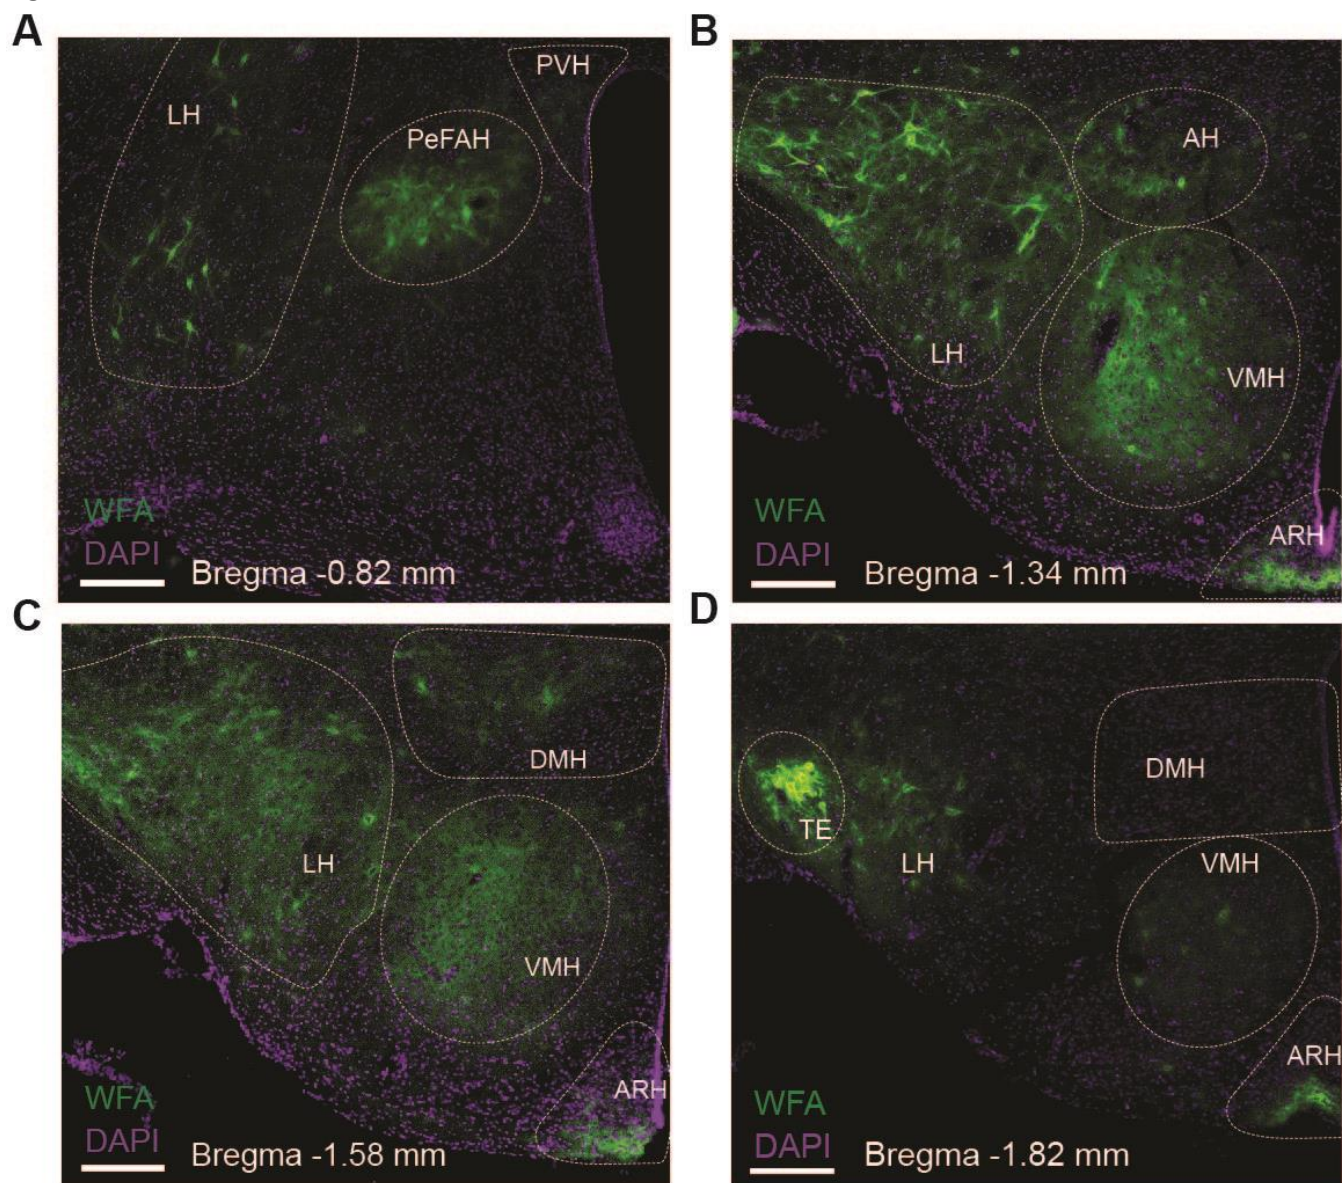



**Figure 2**

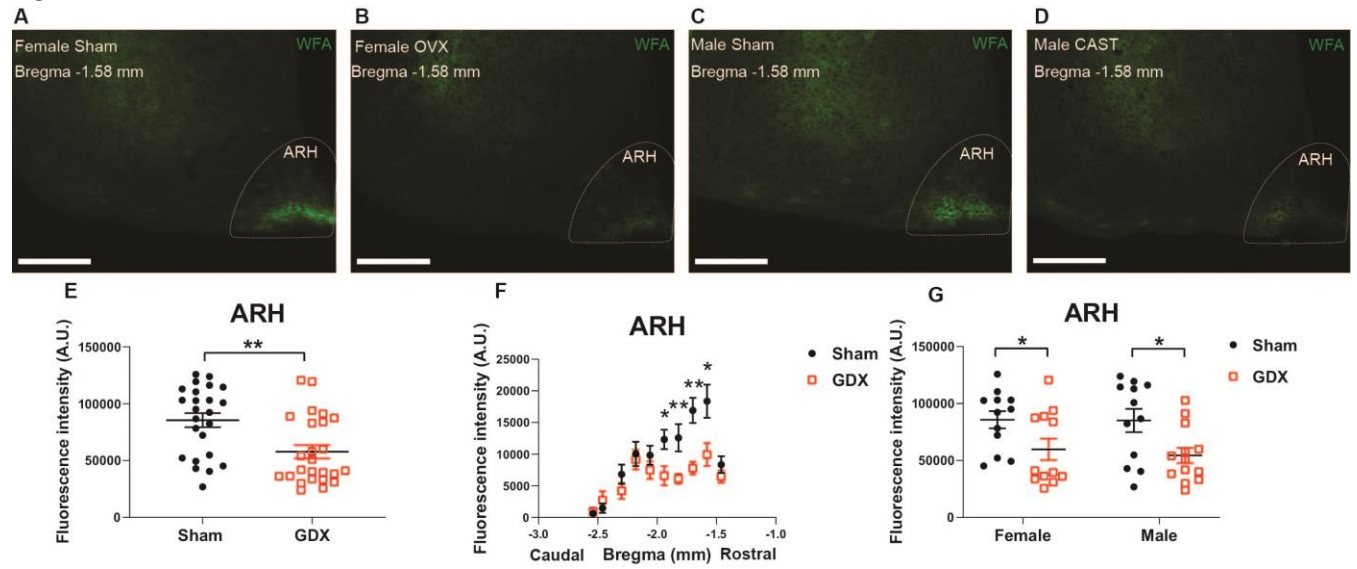

**Figure 3**

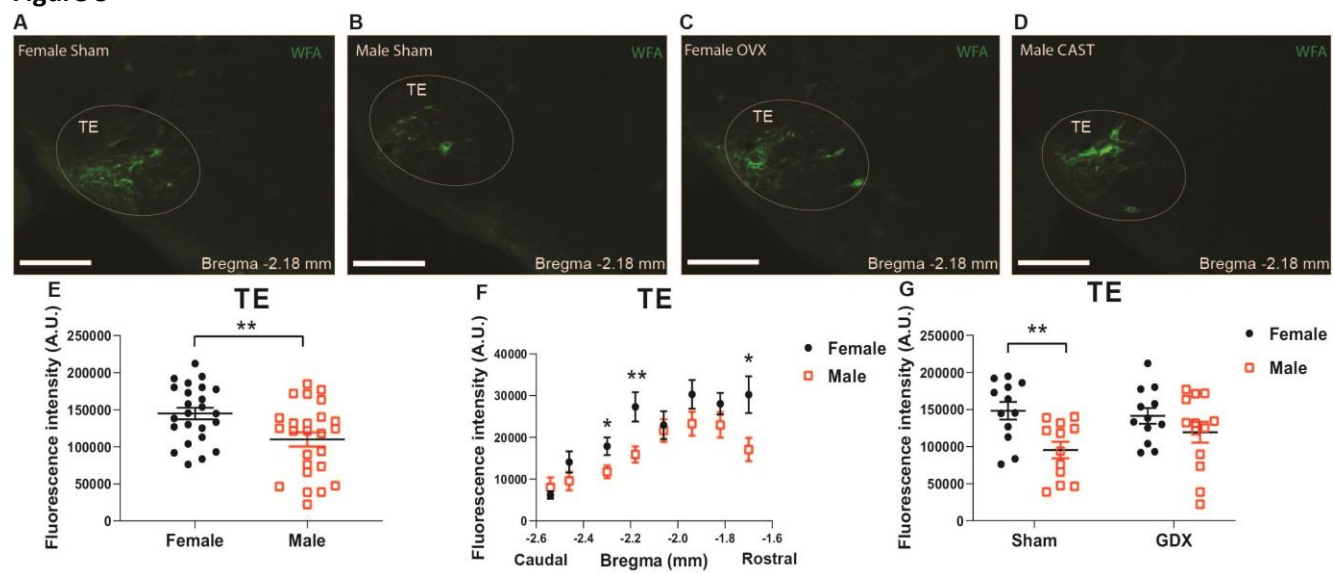

**Figure 4**

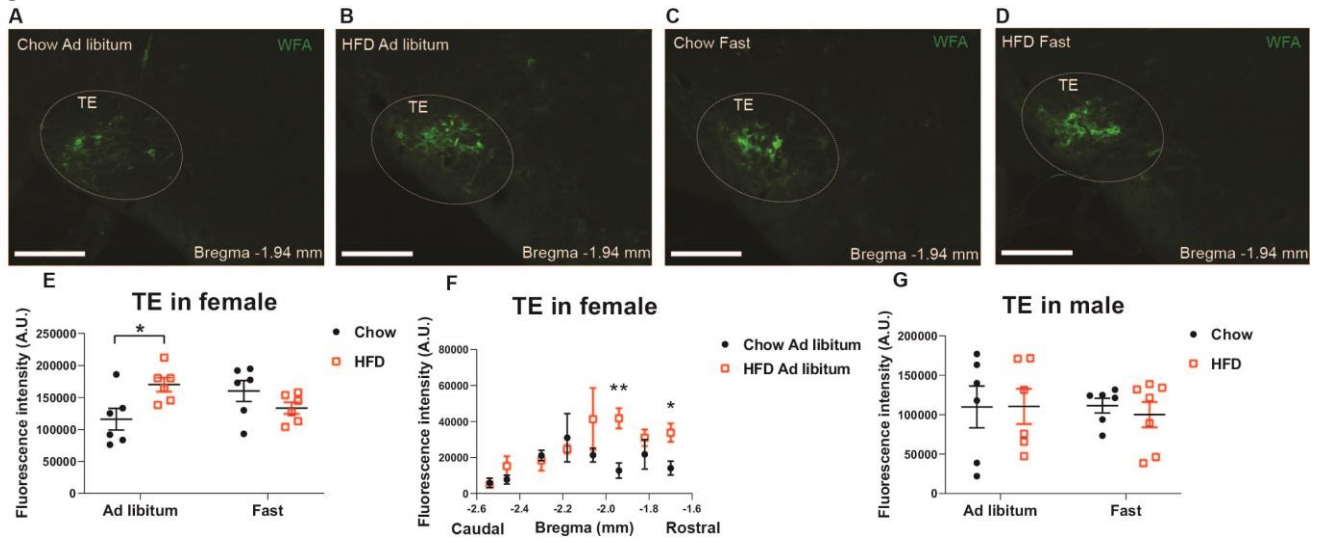

Source: http://biorxiv.org/content/10.1101/2021.03.07.434286v1.full.pdf
